# Supplementary material for: The biological relevance of the FspTF transcription factor, homologous of Bqt4, in Fusarium sp. associated with the ambrosia beetle Xylosandrus morigerus
Source: Front Microbiol. 2023 Jul 14;14:1224096. doi: 10.3389/fmicb.2023.1224096 (PMC10375492; doi:10.3389/fmicb.2023.1224096)
Supplement: Supplementary file 10 [file Table_10.XLSX]

## Sheet: Oxidative stress_detoxification
Supplementary Table S10. Component of glutathione pathway and ROS detoxifying enzymes expressed differentially in Fusarium sp. TF65-6
Gene-ID	Fold Change	Saccharomyces cerevisiae S288C	Neurospora crassa OR74A	Fusarium solani	Fusarium oxysporum NRRL 32931	Fusarium fujikuroi IMI 58289	Fusarium verticillioides 7600	Fusarium graminearum PH-1
g11164	3.42507	NP_010542.1 catalase A [Saccharomyces cerevisiae S288C]	XP_961873.1 catalase 2 [Neurospora crassa OR74A]	XP_046129992.1 catalase-like domain-containing protein [Fusarium solani]	XP_031048836.1 catalase [Fusarium oxysporum NRRL 32931]	XP_023427364.1 probable catalase isozyme P [Fusarium fujikuroi IMI 58289]	XP_018760581.1 catalase [Fusarium verticillioides 7600]	XP_011322924.1 catalase [Fusarium graminearum PH-1]
g11238	1.99216	NP_013684.1 thioredoxin peroxidase TSA1 [Saccharomyces cerevisiae S288C]	XP_959621.1 mitochondrial peroxiredoxin PRX1 [Neurospora crassa OR74A]	XP_046129889.1 thioredoxin-like protein [Fusarium solani]	XP_031032191.1 peroxiredoxin (alkyl hydroperoxide reductase subunit C) [Fusarium oxysporum NRRL 32931]	XP_023437228.1 probable thiol-specific antioxidant [Fusarium fujikuroi IMI 58289]	XP_018754893.1 peroxiredoxin (alkyl hydroperoxide reductase subunit C) [Fusarium verticillioides 7600]	XP_011322584.1 peroxiredoxin 1 [Fusarium graminearum PH-1]
g11238	1.99216	NP_013684.1 thioredoxin peroxidase TSA1 [Saccharomyces cerevisiae S288C]	XP_959621.1 mitochondrial peroxiredoxin PRX1 [Neurospora crassa OR74A]	XP_046129889.1 thioredoxin-like protein [Fusarium solani]	XP_031032191.1 peroxiredoxin (alkyl hydroperoxide reductase subunit C) [Fusarium oxysporum NRRL 32931]	XP_023437228.1 probable thiol-specific antioxidant [Fusarium fujikuroi IMI 58289]	XP_018754893.1 peroxiredoxin (alkyl hydroperoxide reductase subunit C) [Fusarium verticillioides 7600]	XP_011322584.1 peroxiredoxin 1 [Fusarium graminearum PH-1]
g10102	1.69818	NP_012255.3 thioredoxin peroxidase DOT5 [Saccharomyces cerevisiae S288C]	XP_011394748.1 merozoite capping protein-1 [Neurospora crassa OR74A]	XP_046133963.1 thioredoxin-like protein [Fusarium solani]	XP_031039272.1 peroxiredoxin Q/BCP [Fusarium oxysporum NRRL 32931]	XP_023430454.1 related to DOT5-involved in derepression of telomeric silencing [Fusarium fujikuroi IMI 58289]	XP_018746934.1 peroxiredoxin Q/BCP [Fusarium verticillioides 7600]	XP_011319255.1 hypothetical protein FGSG_10296 [Fusarium graminearum PH-1]
g13328	1.62543	NP_010113.1 bifunctional alcohol dehydrogenase/S-(hydroxymethyl)glutathione dehydrogenase [Saccharomyces cerevisiae S288C]	XP_964140.2 alcohol dehydrogenase [Neurospora crassa OR74A]	XP_046135110.1 chaperonin 10-like protein [Fusarium solani]	XP_031031473.1 uncharacterized protein FOYG_14642 [Fusarium oxysporum NRRL 32931]	XP_023434687.1 related to zinc-containing long-chain alcohol dehydrogenase [Fusarium fujikuroi IMI 58289]	XP_018762348.1 hypothetical protein FVEG_13928 [Fusarium verticillioides 7600]	XP_011325847.1 hypothetical protein FGSG_11387 [Fusarium graminearum PH-1]
g06615	1.54344	NP_015277.1 translation elongation factor EF1B gamma [Saccharomyces cerevisiae S288C]	XP_001728167.1 glutathione S-transferase-4 [Neurospora crassa OR74A]	XP_046135577.1 glutathione S-transferase [Fusarium solani]	XP_031048415.1 elongation factor 1-gamma [Fusarium oxysporum NRRL 32931]	XP_023435340.1 fusarin C cluster-translation Elongation factor [Fusarium fujikuroi IMI 58289]	XP_018758497.1 elongation factor 1-gamma [Fusarium verticillioides 7600]	XP_011327619.1 hypothetical protein FGSG_13223 [Fusarium graminearum PH-1]
g08764	-1.00575	NP_013144.1 thioredoxin TRX1 [Saccharomyces cerevisiae S288C]	XP_011392793.1 thioredoxin, variant [Neurospora crassa OR74A]	XP_046140378.1 mitochondrial small ribosomal subunit Rsm22-domain-containing protein [Fusarium solani]	XP_031044571.1 uncharacterized protein FOYG_04633 [Fusarium oxysporum NRRL 32931]	XP_023426545.1 probable thioredoxin [Fusarium fujikuroi IMI 58289]	XP_018748238.1 hypothetical protein FVEG_03999 [Fusarium verticillioides 7600]	XP_011328285.1 hypothetical protein FGSG_13584 [Fusarium graminearum PH-1]
g06050	-1.09679	NP_014170.1 glutathione peroxidase [Saccharomyces cerevisiae S288C]	XP_961265.2 theta class glutathione S-transferase [Neurospora crassa OR74A]	XP_046127828.1 glutathione S-transferase [Fusarium solani]	XP_031049534.1 glutathione S-transferase [Fusarium oxysporum NRRL 32931]	XP_023434341.1 related to URE2-nitrogen catabolite repression regulator [Fusarium fujikuroi IMI 58289]	XP_018753504.1 glutathione S-transferase [Fusarium verticillioides 7600]	XP_011317864.1 hypothetical protein FGSG_02000 [Fusarium graminearum PH-1]
g14053	-1.18377	NP_014490.1 methylglyoxal reductase (NADPH-dependent) GRE2 [Saccharomyces cerevisiae S288C]	XP_956467.2 ketoreductase [Neurospora crassa OR74A]	XP_046129516.1 uncharacterized protein B0J15DRAFT_399369 [Fusarium solani]	XP_031029184.1 dihydroflavonol-4-reductase [Fusarium oxysporum NRRL 32931]	XP_023423903.1 related to aldehyde reductase II [Fusarium fujikuroi IMI 58289]	XP_018756486.1 dihydroflavonol-4-reductase [Fusarium verticillioides 7600]	XP_011317285.1 hypothetical protein FGSG_01476 [Fusarium graminearum PH-1]
g11408	-1.25821	NP_010822.1 glutathione-independent methylglyoxalase [Saccharomyces cerevisiae S288C]	XP_962345.1 ThiJ/PfpI family protein [Neurospora crassa OR74A]	XP_046131704.1 class I glutamine amidotransferase-like protein [Fusarium solani]	XP_031036330.1 uncharacterized protein FOYG_11614 [Fusarium oxysporum NRRL 32931]	XP_023433045.1 related to NonF protein, involved in nonactin biosynthesis [Fusarium fujikuroi IMI 58289]	XP_018752220.1 hypothetical protein FVEG_06630 [Fusarium verticillioides 7600]	XP_011328831.1 hypothetical protein FGSG_08979 [Fusarium graminearum PH-1]
g00990	-1.3565	NP_015234.1 glutathione-disulfide reductase GLR1 [Saccharomyces cerevisiae S288C]	XP_011393527.1 glutathione reductase, variant [Neurospora crassa OR74A]	XP_046136799.1 uncharacterized protein B0J15DRAFT_388217 [Fusarium solani]	XP_031050926.1 glutathione reductase [Fusarium oxysporum NRRL 32931]	XP_023429307.1 probable glutathione reductase (NADPH) [Fusarium fujikuroi IMI 58289]	XP_018749518.1 glutathione reductase [Fusarium verticillioides 7600]	XP_011323689.1 glutathione reductase [Fusarium graminearum PH-1]
g09539	-1.5328	---	---	XP_046129021.1 Mss4-like protein [Fusarium solani]	XP_031035337.1 S-(hydroxymethyl)glutathione synthase [Fusarium oxysporum NRRL 32931]	XP_023433572.1 probable Putative glutathione-dependent formaldehyde-activating enzyme [Fusarium fujikuroi IMI 58289]	XP_018759025.1 S-(hydroxymethyl)glutathione synthase [Fusarium verticillioides 7600]	XP_011325627.1 glutathione-dependent formaldehyde-activating enzyme [Fusarium graminearum PH-1]
g15684	-1.62983	---	---	XP_046125623.1 putative glutathione-S-transferase theta, GST [Fusarium solani]	XP_031031966.1 glutathione S-transferase [Fusarium oxysporum NRRL 32931]	XP_023437895.1 probable glutathione S-transferase [Fusarium fujikuroi IMI 58289]	XP_018757954.1 hypothetical protein FVEG_10652 [Fusarium verticillioides 7600]	XP_011325320.1 glutathione S-transferase [Fusarium graminearum PH-1]
g02744	-1.64042	NP_012304.1 bifunctional glutathione transferase/peroxidase [Saccharomyces cerevisiae S288C]	XP_963068.2 glutathione S-transferase [Neurospora crassa OR74A]	XP_046133518.1 glutathione S-transferase [Fusarium solani]	XP_031051627.1 glutathione S-transferase [Fusarium oxysporum NRRL 32931]	XP_023428882.1 related to glutathione S-transferase III [Fusarium fujikuroi IMI 58289]	XP_018748858.1 glutathione S-transferase [Fusarium verticillioides 7600]	XP_011324426.1 hypothetical protein FGSG_12821 [Fusarium graminearum PH-1]
g01918	-1.66446	NP_010419.3 ATP-binding cassette glutathione S-conjugate transporter YCF1 [Saccharomyces cerevisiae S288C]	XP_961122.3 ABC multidrug transporter [Neurospora crassa OR74A]	XP_046130725.1 P-loop containing nucleoside triphosphate hydrolase protein [Fusarium solani]	XP_031049878.1 uncharacterized protein FOYG_00668 [Fusarium oxysporum NRRL 32931]	XP_023434519.1 related to multidrug resistance protein [Fusarium fujikuroi IMI 58289]	XP_018753188.1 hypothetical protein FVEG_16052 [Fusarium verticillioides 7600]	XP_011318225.1 hypothetical protein FGSG_02316 [Fusarium graminearum PH-1]
g04450	-1.68296	---	XP_959219.3 glutathione S-transferase [Neurospora crassa OR74A]	XP_046132267.1 glutathione S-transferase [Fusarium solani]	XP_031034154.1 glutathione S-transferase [Fusarium oxysporum NRRL 32931]	XP_023435670.1 uncharacterized protein FFUJ_09603 [Fusarium fujikuroi IMI 58289]	XP_018757535.1 glutathione S-transferase [Fusarium verticillioides 7600]	XP_011321472.1 hypothetical protein FGSG_04157 [Fusarium graminearum PH-1]
g04479	-1.7979	NP_013752.1 copper chaperone CCS1 [Saccharomyces cerevisiae S288C]	XP_963112.2 superoxide dismutase 1 copper chaperone [Neurospora crassa OR74A]	XP_046132301.1 superoxide dismutase [Fusarium solani]	XP_031034215.1 uncharacterized protein FOYG_12519 [Fusarium oxysporum NRRL 32931]	XP_023435702.1 probable LYS7-copper chaperone for superoxide dismutase Sod1p [Fusarium fujikuroi IMI 58289]	XP_018757472.1 hypothetical protein FVEG_10310 [Fusarium verticillioides 7600]	XP_011321512.1 hypothetical protein FGSG_04124 [Fusarium graminearum PH-1]
g02185	-1.92069	---	---	XP_046131029.1 catalase-like domain-containing protein [Fusarium solani]	XP_031038826.1 catalase [Fusarium oxysporum NRRL 32931]	XP_023430131.1 related to srpA precursor [Fusarium fujikuroi IMI 58289]	XP_018747387.1 catalase [Fusarium verticillioides 7600]	XP_011318110.1 hypothetical protein FGSG_02217 [Fusarium graminearum PH-1]
g04787	-2.01368	---	XP_964710.3 glutathione transferase omega-1 [Neurospora crassa OR74A]	XP_046132629.1 glutathione S-transferase [Fusarium solani]	XP_031034066.1 glutathione S-transferase [Fusarium oxysporum NRRL 32931]	XP_023435612.1 related to glutathione transferase omega 1 [Fusarium fujikuroi IMI 58289]	XP_018757626.1 glutathione S-transferase [Fusarium verticillioides 7600]	XP_011321414.1 hypothetical protein FGSG_04212 [Fusarium graminearum PH-1]
g01807	-2.13426	NP_012992.1 cytochrome-c peroxidase [Saccharomyces cerevisiae S288C]	XP_959745.1 peroxidase/catalase 2 [Neurospora crassa OR74A]	XP_046130604.1 heme peroxidase [Fusarium solani]	XP_031030333.1 catalase-peroxidase [Fusarium oxysporum NRRL 32931]	XP_023437719.1 probable catalase 2 [Fusarium fujikuroi IMI 58289]	XP_018758227.1 catalase-peroxidase [Fusarium verticillioides 7600]	XP_011322820.1 peroxidase/catalase 2 [Fusarium graminearum PH-1]
g03317	-2.18589	NP_010558.3 hydroxyacylglutathione hydrolase GLO2 [Saccharomyces cerevisiae S288C]	XP_011394581.1 hydroxyacylglutathione hydrolase, variant 4 [Neurospora crassa OR74A]	XP_046132889.1 hydroxyacylglutathione hydrolase [Fusarium solani]	XP_031048084.1 hydroxyacylglutathione hydrolase [Fusarium oxysporum NRRL 32931]	XP_023428869.1 probable hydroxyacylglutathione hydrolase [Fusarium fujikuroi IMI 58289]	XP_018754305.1 hydroxyacylglutathione hydrolase [Fusarium verticillioides 7600]	XP_011326859.1 hypothetical protein FGSG_13072 [Fusarium graminearum PH-1]
g06203	-2.20371	NP_010801.1 dithiol glutaredoxin GRX2 [Saccharomyces cerevisiae S288C]	XP_961585.2 glutaredoxin [Neurospora crassa OR74A]	XP_046127976.1 thioredoxin-like protein [Fusarium solani]	XP_031049362.1 glutaredoxin 3 [Fusarium oxysporum NRRL 32931]	XP_023434238.1 probable glutaredoxin [Fusarium fujikuroi IMI 58289]	XP_018753660.1 glutaredoxin 3 [Fusarium verticillioides 7600]	XP_011317972.1 hypothetical protein FGSG_02097 [Fusarium graminearum PH-1]
g10432	-2.23433	---	XP_964710.3 glutathione transferase omega-1 [Neurospora crassa OR74A]	XP_046133657.1 thioredoxin-like protein [Fusarium solani]	XP_031041287.1 glutathione S-transferase [Fusarium oxysporum NRRL 32931]	XP_023425227.1 related to glutathione transferase omega 1 [Fusarium fujikuroi IMI 58289]	XP_018742207.1 glutathione S-transferase [Fusarium verticillioides 7600]	XP_011315785.1 hypothetical protein FGSG_00172 [Fusarium graminearum PH-1]
g01227	-2.35045	NP_014683.1 hydroxyacylglutathione hydrolase GLO4 [Saccharomyces cerevisiae S288C]	XP_959797.3 metallo-beta-lactamase domain-containing protein [Neurospora crassa OR74A]	XP_046126992.1 beta-lactamase-like protein [Fusarium solani]	XP_031050472.1 uncharacterized protein FOYG_01154 [Fusarium oxysporum NRRL 32931]	XP_023429539.1 probable metallo-beta-lactamase domain protein [Fusarium fujikuroi IMI 58289]	XP_018760003.1 hypothetical protein FVEG_12159 [Fusarium verticillioides 7600]	XP_011327805.1 hypothetical protein FGSG_07959 [Fusarium graminearum PH-1]
g13357	-2.5395	---	XP_965570.1 hypothetical protein NCU02888 [Neurospora crassa OR74A]	XP_046123254.1 uncharacterized protein B0J15DRAFT_506753 [Fusarium solani]	XP_031050209.1 uncharacterized protein FOYG_00950 [Fusarium oxysporum NRRL 32931]	XP_023430021.1 related to putative glutathione S-transferase [Fusarium fujikuroi IMI 58289]	XP_018759773.1 hypothetical protein FVEG_11981 [Fusarium verticillioides 7600]	XP_011318194.1 hypothetical protein FGSG_02286 [Fusarium graminearum PH-1]
g12147	-2.54681	NP_011872.1 superoxide dismutase SOD2 [Saccharomyces cerevisiae S288C]	XP_011395300.1 superoxide dismutase [Neurospora crassa OR74A]	XP_046128331.1 Manganese/iron superoxide dismutase [Fusarium solani]	XP_031033606.1 Fe-Mn family superoxide dismutase [Fusarium oxysporum NRRL 32931]	XP_023435447.1 probable SOD2-superoxide dismutase (Mn) precursor, mitochondrial [Fusarium fujikuroi IMI 58289]	XP_018758633.1 Fe-Mn family superoxide dismutase [Fusarium verticillioides 7600]	XP_011321146.1 superoxide dismutase [Fusarium graminearum PH-1]
g07704	-2.77742	---	---	XP_046125536.1 glutathione S-transferase [Fusarium solani]	XP_031038506.1 maleylacetoacetate isomerase [Fusarium oxysporum NRRL 32931]	XP_023431649.1 probable maleylacetoacetate isomerase [Fusarium fujikuroi IMI 58289]	XP_018761364.1 maleylacetoacetate isomerase [Fusarium verticillioides 7600]	XP_011322954.1 hypothetical protein FGSG_02852 [Fusarium graminearum PH-1]
g07704	-2.77742	---	---	XP_046125536.1 glutathione S-transferase [Fusarium solani]	XP_031038506.1 maleylacetoacetate isomerase [Fusarium oxysporum NRRL 32931]	XP_023431649.1 probable maleylacetoacetate isomerase [Fusarium fujikuroi IMI 58289]	XP_018761364.1 maleylacetoacetate isomerase [Fusarium verticillioides 7600]	XP_011322954.1 hypothetical protein FGSG_02852 [Fusarium graminearum PH-1]
g03050	-2.78622	NP_012303.1 peroxiredoxin HYR1 [Saccharomyces cerevisiae S288C]	XP_957919.2 peroxiredoxin HYR1 [Neurospora crassa OR74A]	XP_046133160.1 thioredoxin-like protein [Fusarium solani]	XP_031051029.1 glutathione peroxidase [Fusarium oxysporum NRRL 32931]	XP_023429242.1 probable HYR1-glutathione peroxidase [Fusarium fujikuroi IMI 58289]	XP_018749411.1 glutathione peroxidase [Fusarium verticillioides 7600]	XP_011324782.1 peroxiredoxin HYR1 [Fusarium graminearum PH-1]
g02276	-2.9239	NP_013002.3 S-glutathionyl-(chloro)hydroquinone reductase [Saccharomyces cerevisiae S288C]	XP_956141.2 glutathione S-transferase Gst3 [Neurospora crassa OR74A]	XP_046131139.1 glutathione S-transferase [Fusarium solani]	XP_031032905.1 glutathione S-transferase [Fusarium oxysporum NRRL 32931]	XP_023436500.1 related to ECM4 protein (involved in cell wall biogenesis and architecture) [Fusarium fujikuroi IMI 58289]	XP_018761801.1 glutathione S-transferase [Fusarium verticillioides 7600]	XP_011328017.1 hypothetical protein FGSG_09688 [Fusarium graminearum PH-1]
g03668	-3.08879	NP_014170.1 glutathione peroxidase [Saccharomyces cerevisiae S288C]	XP_961265.2 theta class glutathione S-transferase [Neurospora crassa OR74A]	XP_046128138.1 glutathione S-transferase [Fusarium solani]	XP_031048307.1 glutathione S-transferase [Fusarium oxysporum NRRL 32931]	XP_023427698.1 related to URE2-nitrogen catabolite repression regulator [Fusarium fujikuroi IMI 58289]	XP_018753504.1 glutathione S-transferase [Fusarium verticillioides 7600]	XP_011322790.1 hypothetical protein FGSG_03000 [Fusarium graminearum PH-1]
g04808	-3.17452	NP_013171.1 D-xylulose reductase XYL2 [Saccharomyces cerevisiae S288C]	XP_001728031.1 S-(hydroxymethyl)glutathione dehydrogenase [Neurospora crassa OR74A]	XP_046132637.1 uncharacterized protein B0J15DRAFT_492748 [Fusarium solani]	XP_031034064.1 alcohol dehydrogenase [Fusarium oxysporum NRRL 32931]	XP_023435610.1 related to formaldehyde dehydrogenase [Fusarium fujikuroi IMI 58289]	XP_018757628.1 alcohol dehydrogenase [Fusarium verticillioides 7600]	XP_011321411.1 glutathione-independent formaldehyde dehydrogenase [Fusarium graminearum PH-1]
g00392	-3.35674	---	XP_011394029.1 DSBA family oxidoreductase [Neurospora crassa OR74A]	XP_046137410.1 thioredoxin-like protein [Fusarium solani]	XP_031046922.1 uncharacterized protein FOYG_02696 [Fusarium oxysporum NRRL 32931]	XP_023428309.1 related to glutathione S-transferase [Fusarium fujikuroi IMI 58289]	XP_018750419.1 hypothetical protein FVEG_05362 [Fusarium verticillioides 7600]	XP_011326955.1 hypothetical protein FGSG_07224 [Fusarium graminearum PH-1]
g10861	-3.49107	---	---	XP_046130342.1 uncharacterized protein B0J15DRAFT_495656 [Fusarium solani]	XP_031032564.1 iron-dependent peroxidase [Fusarium oxysporum NRRL 32931]	XP_023436763.1 probable iron-dependent peroxidase [Fusarium fujikuroi IMI 58289]	XP_018755259.1 iron-dependent peroxidase [Fusarium verticillioides 7600]	XP_011322923.1 hypothetical protein FGSG_02882 [Fusarium graminearum PH-1]
g08886	-3.63991	NP_014170.1 glutathione peroxidase [Saccharomyces cerevisiae S288C]	XP_961265.2 theta class glutathione S-transferase [Neurospora crassa OR74A]	XP_046140514.1 glutathione S-transferase [Fusarium solani]	XP_031044289.1 uncharacterized protein FOYG_04435 [Fusarium oxysporum NRRL 32931]	XP_023426710.1 related to URE2-nitrogen catabolite repression regulator [Fusarium fujikuroi IMI 58289]	XP_018748011.1 hypothetical protein FVEG_03830 [Fusarium verticillioides 7600]	XP_011328487.1 hypothetical protein FGSG_09279 [Fusarium graminearum PH-1]
g13150	-3.99193	---	XP_959219.3 glutathione S-transferase [Neurospora crassa OR74A]	XP_046134928.1 glutathione S-transferase [Fusarium solani]	XP_031030012.1 uncharacterized protein FOYG_15369 [Fusarium oxysporum NRRL 32931]	XP_023437411.1 uncharacterized protein FFUJ_11384 [Fusarium fujikuroi IMI 58289]	XP_018761019.1 hypothetical protein FVEG_17405 [Fusarium verticillioides 7600]	XP_011321885.1 hypothetical protein FGSG_03802 [Fusarium graminearum PH-1]
g04875	-4.29164	NP_010822.1 glutathione-independent methylglyoxalase [Saccharomyces cerevisiae S288C]	XP_962345.1 ThiJ/PfpI family protein [Neurospora crassa OR74A]	XP_046132680.1 uncharacterized protein B0J15DRAFT_512118 [Fusarium solani]	XP_031034675.1 uncharacterized protein FOYG_12867 [Fusarium oxysporum NRRL 32931]	XP_023435991.1 related to NonF protein, involved in nonactin biosynthesis [Fusarium fujikuroi IMI 58289]	XP_018757081.1 hypothetical protein FVEG_10010 [Fusarium verticillioides 7600]	XP_011328831.1 hypothetical protein FGSG_08979 [Fusarium graminearum PH-1]
g07923	-4.5562	NP_010542.1 catalase A [Saccharomyces cerevisiae S288C]	XP_961873.1 catalase 2 [Neurospora crassa OR74A]	XP_046139424.1 catalase-like domain-containing protein [Fusarium solani]	XP_031050179.1 catalase [Fusarium oxysporum NRRL 32931]	XP_023429951.1 probable catalase isozyme P [Fusarium fujikuroi IMI 58289]	XP_018759738.1 catalase [Fusarium verticillioides 7600]	XP_011322924.1 catalase [Fusarium graminearum PH-1]
g08328	-4.65203	NP_014170.1 glutathione peroxidase [Saccharomyces cerevisiae S288C]	XP_960040.1 glutathione transferase [Neurospora crassa OR74A]	XP_046139868.1 glutathione S-transferase [Fusarium solani]	XP_031040990.1 glutathione S-transferase [Fusarium oxysporum NRRL 32931]	XP_023437042.1 related to theta class glutathione S-transferase [Fusarium fujikuroi IMI 58289]	XP_018754933.1 hypothetical protein FVEG_08420 [Fusarium verticillioides 7600]	XP_011317656.1 hypothetical protein FGSG_01816 [Fusarium graminearum PH-1]
g05184	-4.69985	---	XP_001728273.1 hypothetical protein NCU11286 [Neurospora crassa OR74A]	XP_046124241.1 heme peroxidase [Fusarium solani]	XP_031040859.1 uncharacterized protein FOYG_08866 [Fusarium oxysporum NRRL 32931]	XP_023431169.1 related to feebly like protein [Fusarium fujikuroi IMI 58289]	XP_018756168.1 hypothetical protein FVEG_09318 [Fusarium verticillioides 7600]	XP_011320662.1 hypothetical protein FGSG_08151 [Fusarium graminearum PH-1]
g04240	-4.97737	NP_009341.2 (R,R)-butanediol dehydrogenase [Saccharomyces cerevisiae S288C]	XP_001728031.1 S-(hydroxymethyl)glutathione dehydrogenase [Neurospora crassa OR74A]	XP_046132036.1 chaperonin 10-like protein [Fusarium solani]	XP_031040843.1 S-(hydroxymethyl)glutathione dehydrogenase/alcohol dehydrogenase [Fusarium oxysporum NRRL 32931]	XP_023431157.1 related to formaldehyde dehydrogenase [Fusarium fujikuroi IMI 58289]	XP_018756151.1 S-(hydroxymethyl)glutathione dehydrogenase/alcohol dehydrogenase [Fusarium verticillioides 7600]	XP_011318353.1 hypothetical protein FGSG_02432 [Fusarium graminearum PH-1]
g03592	-5.29297	NP_013800.1 alcohol dehydrogenase ADH3 [Saccharomyces cerevisiae S288C]	XP_011393725.1 S-(hydroxymethyl)glutathione dehydrogenase [Neurospora crassa OR74A]	XP_046126468.1 chaperonin 10-like protein [Fusarium solani]	XP_031033162.1 uncharacterized protein FOYG_14004 [Fusarium oxysporum NRRL 32931]	XP_023436306.1 related to formaldehyde dehydrogenase [Fusarium fujikuroi IMI 58289]	XP_018762024.1 hypothetical protein FVEG_13775 [Fusarium verticillioides 7600]	XP_011323135.1 hypothetical protein FGSG_04703 [Fusarium graminearum PH-1]
g12126	-5.32035	NP_013710.1 lactoylglutathione lyase GLO1 [Saccharomyces cerevisiae S288C]	---	XP_046128367.1 uncharacterized protein B0J15DRAFT_66645 [Fusarium solani]	XP_031050381.1 uncharacterized protein FOYG_01085 [Fusarium oxysporum NRRL 32931]	XP_023429909.1 uncharacterized protein FFUJ_14510 [Fusarium fujikuroi IMI 58289]	XP_018759914.1 hypothetical protein FVEG_12093 [Fusarium verticillioides 7600]	XP_011327741.1 hypothetical protein FGSG_07906 [Fusarium graminearum PH-1]
g12461	-5.55653	NP_010822.1 glutathione-independent methylglyoxalase [Saccharomyces cerevisiae S288C]	XP_962345.1 ThiJ/PfpI family protein [Neurospora crassa OR74A]	XP_046137796.1 class I glutamine amidotransferase-like protein [Fusarium solani]	XP_031041096.1 uncharacterized protein FOYG_05763 [Fusarium oxysporum NRRL 32931]	XP_023425425.1 related to NonF protein, involved in nonactin biosynthesis [Fusarium fujikuroi IMI 58289]	XP_018752220.1 hypothetical protein FVEG_06630 [Fusarium verticillioides 7600]	XP_011328831.1 hypothetical protein FGSG_08979 [Fusarium graminearum PH-1]
g06109	-5.90153	NP_011872.1 superoxide dismutase SOD2 [Saccharomyces cerevisiae S288C]	XP_961579.3 superoxide dismutase [Neurospora crassa OR74A]	XP_046127921.1 Manganese/iron superoxide dismutase [Fusarium solani]	XP_031049442.1 Fe-Mn family superoxide dismutase [Fusarium oxysporum NRRL 32931]	XP_023434285.1 probable manganese superoxide dismutase precursor (sod-2) [Fusarium fujikuroi IMI 58289]	XP_018753579.1 superoxide dismutase [Mn], mitochondrial [Fusarium verticillioides 7600]	XP_011317924.1 superoxide dismutase [Fusarium graminearum PH-1]
g13253	-6.3528	NP_010822.1 glutathione-independent methylglyoxalase [Saccharomyces cerevisiae S288C]	XP_962345.1 ThiJ/PfpI family protein [Neurospora crassa OR74A]	XP_046135026.1 class I glutamine amidotransferase-like protein [Fusarium solani]	XP_031032483.1 uncharacterized protein FOYG_13373 [Fusarium oxysporum NRRL 32931]	XP_023436829.1 related to NonF protein, involved in nonactin biosynthesis [Fusarium fujikuroi IMI 58289]	XP_018755179.1 hypothetical protein FVEG_08620 [Fusarium verticillioides 7600]	XP_011322377.1 hypothetical protein FGSG_03354 [Fusarium graminearum PH-1]
g02250	-6.4035	---	XP_964710.3 glutathione transferase omega-1 [Neurospora crassa OR74A]	XP_046131098.1 thioredoxin-like protein [Fusarium solani]	XP_031041287.1 glutathione S-transferase [Fusarium oxysporum NRRL 32931]	XP_023425227.1 related to glutathione transferase omega 1 [Fusarium fujikuroi IMI 58289]	XP_018742207.1 glutathione S-transferase [Fusarium verticillioides 7600]	XP_011315785.1 hypothetical protein FGSG_00172 [Fusarium graminearum PH-1]
g10968	-7.18013	NP_013040.1 glutathione transferase GTT2 [Saccharomyces cerevisiae S288C]	---	XP_046130249.1 glutathione S-transferase [Fusarium solani]	XP_031049181.1 uncharacterized protein FOYG_00148 [Fusarium oxysporum NRRL 32931]	XP_023434062.1 uncharacterized protein FFUJ_14022 [Fusarium fujikuroi IMI 58289]	XP_018744785.1 hypothetical protein FVEG_01780 [Fusarium verticillioides 7600]	---
g12113	-7.30801	NP_013002.3 S-glutathionyl-(chloro)hydroquinone reductase [Saccharomyces cerevisiae S288C]	XP_959681.3 glutathione transferase [Neurospora crassa OR74A]	XP_046128365.1 glutathione S-transferase [Fusarium solani]	XP_031033637.1 glutathione S-transferase [Fusarium oxysporum NRRL 32931]	XP_023436175.1 related to glutathione S-transferase [Fusarium fujikuroi IMI 58289]	XP_018758663.1 glutathione S-transferase [Fusarium verticillioides 7600]	XP_011321169.1 hypothetical protein FGSG_04433 [Fusarium graminearum PH-1]
g01285	-7.42983	NP_014170.1 glutathione peroxidase [Saccharomyces cerevisiae S288C]	XP_960040.1 glutathione transferase [Neurospora crassa OR74A]	XP_046126945.1 glutathione S-transferase [Fusarium solani]	XP_031040990.1 glutathione S-transferase [Fusarium oxysporum NRRL 32931]	XP_023437042.1 related to theta class glutathione S-transferase [Fusarium fujikuroi IMI 58289]	XP_018754933.1 hypothetical protein FVEG_08420 [Fusarium verticillioides 7600]	XP_011317656.1 hypothetical protein FGSG_01816 [Fusarium graminearum PH-1]
g00081	-7.52761	NP_010822.1 glutathione-independent methylglyoxalase [Saccharomyces cerevisiae S288C]	XP_962345.1 ThiJ/PfpI family protein [Neurospora crassa OR74A]	XP_046137796.1 class I glutamine amidotransferase-like protein [Fusarium solani]	XP_031041096.1 uncharacterized protein FOYG_05763 [Fusarium oxysporum NRRL 32931]	XP_023425425.1 related to NonF protein, involved in nonactin biosynthesis [Fusarium fujikuroi IMI 58289]	XP_018752220.1 hypothetical protein FVEG_06630 [Fusarium verticillioides 7600]	XP_011328831.1 hypothetical protein FGSG_08979 [Fusarium graminearum PH-1]
g12987	-8.44603	NP_011602.2 catalase T [Saccharomyces cerevisiae S288C]	XP_956234.1 catalase-1 [Neurospora crassa OR74A]	XP_046134746.1 catalase-like domain-containing protein [Fusarium solani]	XP_031038826.1 catalase [Fusarium oxysporum NRRL 32931]	XP_023430131.1 related to srpA precursor [Fusarium fujikuroi IMI 58289]	XP_018747387.1 catalase [Fusarium verticillioides 7600]	XP_011318110.1 hypothetical protein FGSG_02217 [Fusarium graminearum PH-1]
g13081	-9.53836	NP_015277.1 translation elongation factor EF1B gamma [Saccharomyces cerevisiae S288C]	XP_001728167.1 glutathione S-transferase-4 [Neurospora crassa OR74A]	XP_046134847.1 Alpha/Beta hydrolase protein [Fusarium solani]	XP_031048415.1 elongation factor 1-gamma [Fusarium oxysporum NRRL 32931]	XP_023435340.1 fusarin C cluster-translation Elongation factor [Fusarium fujikuroi IMI 58289]	XP_018758497.1 elongation factor 1-gamma [Fusarium verticillioides 7600]	XP_011327619.1 hypothetical protein FGSG_13223 [Fusarium graminearum PH-1]
g12977	-10.139	NP_014170.1 glutathione peroxidase [Saccharomyces cerevisiae S288C]	XP_960040.1 glutathione transferase [Neurospora crassa OR74A]	XP_046134719.1 glutathione S-transferase [Fusarium solani]	XP_031040990.1 glutathione S-transferase [Fusarium oxysporum NRRL 32931]	XP_023437042.1 related to theta class glutathione S-transferase [Fusarium fujikuroi IMI 58289]	XP_018754933.1 hypothetical protein FVEG_08420 [Fusarium verticillioides 7600]	XP_011317656.1 hypothetical protein FGSG_01816 [Fusarium graminearum PH-1]
g06150	-10.3678	---	---	XP_046127948.1 uncharacterized protein B0J15DRAFT_469106 [Fusarium solani]	XP_031049406.1 uncharacterized protein FOYG_00340 [Fusarium oxysporum NRRL 32931]	XP_023434261.1 related to glutathione S-transferase [Fusarium fujikuroi IMI 58289]	XP_018753614.1 hypothetical protein FVEG_07534 [Fusarium verticillioides 7600]	---
g07643	-13.7947	---	---	XP_046125623.1 putative glutathione-S-transferase theta, GST [Fusarium solani]	XP_031031966.1 glutathione S-transferase [Fusarium oxysporum NRRL 32931]	XP_023437200.1 probable glutathione S-transferase [Fusarium fujikuroi IMI 58289]	XP_018757954.1 hypothetical protein FVEG_10652 [Fusarium verticillioides 7600]	XP_011325320.1 glutathione S-transferase [Fusarium graminearum PH-1]
