# Supplementary material for: The biological relevance of the FspTF transcription factor, homologous of Bqt4, in Fusarium sp. associated with the ambrosia beetle Xylosandrus morigerus
Source: Front Microbiol. 2023 Jul 14;14:1224096. doi: 10.3389/fmicb.2023.1224096 (PMC10375492; doi:10.3389/fmicb.2023.1224096)
Supplement: Supplementary file 11 [file Table_11.XLSX]

## Sheet: Hoja1
Supplementary Table S11. Putative Transcriptional Regulators expressed differentially in Fusarium sp. TF65-6
Gene-ID	Fold Change	Saccharomyces cerevisiae S288C	Neurospora crassa OR74A	Fusarium solani	Fusarium oxysporum NRRL 32931	Fusarium fujikuroi IMI 58289	Fusarium verticillioides 7600	Fusarium graminearum PH-1		Conserved Domain (CD) database Accession	Protein Family
g01982	4.56634	NP_013610.1 Arg81p [Saccharomyces cerevisiae S288C]	---	XP_046130892.1 fungal-specific transcription factor domain-containing protein [Fusarium solani]	XP_031032140.1 uncharacterized protein FOYG_13066 [Fusarium oxysporum NRRL 32931]	XP_023432622.1 ARG81-Transcription factor involved in arginine metabolism [Fusarium fujikuroi IMI 58289]	XP_018744645.1 hypothetical protein FVEG_01662 [Fusarium verticillioides 7600]	XP_011322544.1 hypothetical protein FGSG_03214 [Fusarium graminearum PH-1]		cl23766	fungal_TF_MHR superfamily
g12515	4.08462	NP_010909.1 Mit1p [Saccharomyces cerevisiae S288C]	XP_957995.1 cAMP-independent regulatory protein pac2 [Neurospora crassa OR74A]	XP_046132137.1 Gti1/Pac2 family-domain-containing protein [Fusarium solani]	XP_031040579.1 uncharacterized protein FOYG_08694 [Fusarium oxysporum NRRL 32931]	XP_023431464.1 pac2-like protein [Fusarium fujikuroi IMI 58289]	XP_018755880.1 hypothetical protein FVEG_09150 [Fusarium verticillioides 7600]	XP_011318535.1 hypothetical protein FGSG_12164 [Fusarium graminearum PH-1]		cl02096	Gti1_Pac2 superfamily
g12329	3.70311	NP_010909.1 Mit1p [Saccharomyces cerevisiae S288C]	XP_957995.1 cAMP-independent regulatory protein pac2 [Neurospora crassa OR74A]	XP_046132137.1 Gti1/Pac2 family-domain-containing protein [Fusarium solani]	XP_031040579.1 uncharacterized protein FOYG_08694 [Fusarium oxysporum NRRL 32931]	XP_023431464.1 pac2-like protein [Fusarium fujikuroi IMI 58289]	XP_018755880.1 hypothetical protein FVEG_09150 [Fusarium verticillioides 7600]	XP_011318535.1 hypothetical protein FGSG_12164 [Fusarium graminearum PH-1]		cl02096	Gti1_Pac2 superfamily
g04780	3.02226	NP_012853.1 uncharacterized protein YKL070W [Saccharomyces cerevisiae S288C]	---	XP_046132625.1 transcriptional regulator PAI 2-type [Fusarium solani]	XP_031034069.1 transcriptional regulator [Fusarium oxysporum NRRL 32931]	XP_023435615.1 probable transcriptional regulator [Fusarium fujikuroi IMI 58289]	XP_018757622.1 transcriptional regulator [Fusarium verticillioides 7600]	XP_011321417.1 hypothetical protein FGSG_04209 [Fusarium graminearum PH-1]		cl00381	PNPOx/FlaRed_like superfamily
g15586	2.98775	NP_010007.1 chromatin-silencing transcriptional regulator TUP1 [Saccharomyces cerevisiae S288C]	XP_962921.1 transcriptional repressor rco-1 [Neurospora crassa OR74A]	XP_046124820.1 WD40-repeat-containing domain protein [Fusarium solani]	XP_031040627.1 glucose repression regulatory protein TUP1 [Fusarium oxysporum NRRL 32931]	XP_023431397.1 probable transcriptional repressor rco-1 [Fusarium fujikuroi IMI 58289]	XP_018755936.1 glucose repression regulatory protein TUP1 [Fusarium verticillioides 7600]	XP_011328862.1 hypothetical protein FGSG_08955 [Fusarium graminearum PH-1]		cl23491	zf-C2H2 superfamily
g12524	2.75993	---	---	XP_046123428.1 fungal-specific transcription factor domain-containing protein [Fusarium solani]	---	---	---	---		cl23766	fungal_TF_MHR superfamily
g11378	2.56201	NP_012910.1 Put3p [Saccharomyces cerevisiae S288C]	XP_960322.2 BEAK-2 [Neurospora crassa OR74A]	XP_046131748.1 uncharacterized protein B0J15DRAFT_494265 [Fusarium solani]	XP_031044425.1 uncharacterized protein FOYG_04535 [Fusarium oxysporum NRRL 32931]	XP_023426628.1 related to positive activator of transcription [Fusarium fujikuroi IMI 58289]	XP_018748127.1 hypothetical protein FVEG_03916 [Fusarium verticillioides 7600]	XP_011328374.1 hypothetical protein FGSG_09371 [Fusarium graminearum PH-1]		cl23766	fungal_TF_MHR superfamily
g00809	2.44669	NP_013329.1 Ecm22p [Saccharomyces cerevisiae S288C]	XP_958476.3 transcriptional regulatory protein Pro-1 [Neurospora crassa OR74A]	XP_046136974.1 fungal-specific transcription factor domain-containing protein [Fusarium solani]	XP_031047838.1 transcriptional regulatory protein Pro-1 [Fusarium oxysporum NRRL 32931]	XP_023427891.1 related to C6 zink-finger protein PRO1A [Fusarium fujikuroi IMI 58289]	XP_018754473.1 transcriptional regulatory protein Pro-1 [Fusarium verticillioides 7600]	XP_011326766.1 transcriptional regulatory protein pro-1 [Fusarium graminearum PH-1]		cl23766	fungal_TF_MHR superfamily, GAL4 superfamily
g00368	2.2403	NP_011836.1 alkaline-responsive transcriptional regulator RIM101 [Saccharomyces cerevisiae S288C]	XP_957214.2 pH-response transcription factor pacC/RIM101 [Neurospora crassa OR74A]	XP_046137443.1 uncharacterized protein B0J15DRAFT_188928 [Fusarium solani]	XP_031046873.1 pH-response transcription factor pacC/RIM101 [Fusarium oxysporum NRRL 32931]	XP_023428338.1 related to pacC-transcription factor [Fusarium fujikuroi IMI 58289]	XP_018750469.1 pH-response transcription factor pacC/RIM101 [Fusarium verticillioides 7600]	XP_011326350.1 hypothetical protein FGSG_12970 [Fusarium graminearum PH-1]		cl23491	zf-C2H2 superfamily
g12519	1.92382	NP_010909.1 Mit1p [Saccharomyces cerevisiae S288C]	XP_957995.1 cAMP-independent regulatory protein pac2 [Neurospora crassa OR74A]	XP_046128797.1 uncharacterized protein B0J15DRAFT_61333 [Fusarium solani]	XP_031040579.1 uncharacterized protein FOYG_08694 [Fusarium oxysporum NRRL 32931]	XP_023431464.1 pac2-like protein [Fusarium fujikuroi IMI 58289]	XP_018755880.1 hypothetical protein FVEG_09150 [Fusarium verticillioides 7600]	XP_011318535.1 hypothetical protein FGSG_12164 [Fusarium graminearum PH-1]		cl02096	Gti1_Pac2 superfamily
g04458	1.90351	NP_009825.4 Rei1p [Saccharomyces cerevisiae S288C]	XP_957637.1 C2H2 finger domain-containing protein [Neurospora crassa OR74A]	XP_046132514.1 C2H2 type zinc-finger-domain-containing protein [Fusarium solani]	XP_031029831.1 uncharacterized protein FOYG_15208 [Fusarium oxysporum NRRL 32931]	XP_023437324.1 related to TRI15-putative transcription factor [Fusarium fujikuroi IMI 58289]	XP_018761111.1 hypothetical protein FVEG_13013 [Fusarium verticillioides 7600]	XP_011321789.1 hypothetical protein FGSG_03881 [Fusarium graminearum PH-1]		cl23491	zf-C2H2_2 superfamily
g05944	1.87794	NP_013232.1 DNA-binding transcription factor ACE2 [Saccharomyces cerevisiae S288C]	XP_961475.2 zinc finger containing protein [Neurospora crassa OR74A]	XP_046127728.1 uncharacterized protein B0J15DRAFT_75141 [Fusarium solani]	XP_031049667.1 uncharacterized protein FOYG_00538 [Fusarium oxysporum NRRL 32931]	XP_023434416.1 uncharacterized protein FFUJ_12194 [Fusarium fujikuroi IMI 58289]	XP_018753387.1 hypothetical protein FVEG_07376 [Fusarium verticillioides 7600]	XP_011317727.1 hypothetical protein FGSG_01877 [Fusarium graminearum PH-1]		cl23491	zf-C2H2_2 superfamily
g11476	1.69318	NP_014371.1 DNA-binding transcription factor CRZ1 [Saccharomyces cerevisiae S288C]	XP_011393650.1 uncharacterized protein NCU09760 [Neurospora crassa OR74A]	XP_046131654.1 uncharacterized protein B0J15DRAFT_494046 [Fusarium solani]	XP_031039041.1 uncharacterized protein FOYG_07738 [Fusarium oxysporum NRRL 32931]	XP_023430311.1 uncharacterized protein FFUJ_07002 [Fusarium fujikuroi IMI 58289]	XP_018747156.1 hypothetical protein FVEG_03173 [Fusarium verticillioides 7600]	XP_011319449.1 hypothetical protein FGSG_10470 [Fusarium graminearum PH-1]		cl23491	zf-H2C2_2 superfamily
g09434	1.44521	NP_015381.1 TFIIH/NER complex subunit TFB4 [Saccharomyces cerevisiae S288C]	XP_956217.1 transcription factor TFIIH subunit Tfb4 [Neurospora crassa OR74A]	XP_046129126.1 TFIIH subunit Tfb4/p34 [Fusarium solani]	XP_031035165.1 transcription initiation factor TFIIH subunit 3 [Fusarium oxysporum NRRL 32931]	XP_023433651.1 related to basic transcription factor 2 (35 kd SU) [Fusarium fujikuroi IMI 58289]	XP_018759190.1 transcription initiation factor TFIIH subunit 3 [Fusarium verticillioides 7600]	XP_011325527.1 hypothetical protein FGSG_10862 [Fusarium graminearum PH-1]		cl22919	Tfb4 superfamily
g08433	1.41257	NP_012425.1 Gzf3p [Saccharomyces cerevisiae S288C]	XP_011394349.1 GATA type zinc finger protein ASD4 [Neurospora crassa OR74A]	XP_046139964.1 uncharacterized protein B0J15DRAFT_540373 [Fusarium solani]	XP_031045865.1 uncharacterized protein FOYG_05454 [Fusarium oxysporum NRRL 32931]	XP_023425875.1 probable GATA type zinc finger protein asd4 [Fusarium fujikuroi IMI 58289]	XP_018751326.1 hypothetical protein FVEG_06055 [Fusarium verticillioides 7600]	XP_011323562.1 GATA type zinc finger protein Asd4 [Fusarium graminearum PH-1]		cl29608	ZnF_GATA superfamily
g08719	1.40914	NP_015338.1 Cmr3p [Saccharomyces cerevisiae S288C]	XP_964590.1 C2H2 conidiation transcription factor FlbC [Neurospora crassa OR74A]	XP_046140319.1 uncharacterized protein B0J15DRAFT_507306 [Fusarium solani]	XP_031044476.1 uncharacterized protein FOYG_04572 [Fusarium oxysporum NRRL 32931]	XP_023426602.1 related to putative C2H2 zinc finger protein flbC [Fusarium fujikuroi IMI 58289]	XP_018748173.1 hypothetical protein FVEG_03950 [Fusarium verticillioides 7600]	XP_011328334.1 hypothetical protein FGSG_09410 [Fusarium graminearum PH-1]		cl23491	zf-C2H2 superfamily
g04384	1.29411	NP_010007.1 chromatin-silencing transcriptional regulator TUP1 [Saccharomyces cerevisiae S288C]	XP_962921.1 transcriptional repressor rco-1 [Neurospora crassa OR74A]	---	XP_031040627.1 glucose repression regulatory protein TUP1 [Fusarium oxysporum NRRL 32931]	XP_023431397.1 probable transcriptional repressor rco-1 [Fusarium fujikuroi IMI 58289]	XP_018755936.1 glucose repression regulatory protein TUP1 [Fusarium verticillioides 7600]	XP_011318432.1 transcriptional repressor rco-1 [Fusarium graminearum PH-1]		cl07262	Tup_N superfamily
g05166	1.20283	NP_013114.1 Ppr1p [Saccharomyces cerevisiae S288C]	XP_962311.3 purine utilization positive regulator [Neurospora crassa OR74A]	XP_046124303.1 fungal-specific transcription factor domain-containing protein [Fusarium solani]	XP_031046499.1 uncharacterized protein FOYG_02400 [Fusarium oxysporum NRRL 32931]	XP_023428861.1 related to purine utilization positive regulator [Fusarium fujikuroi IMI 58289]	XP_018750809.1 hypothetical protein FVEG_15686 [Fusarium verticillioides 7600]	XP_011326126.1 hypothetical protein FGSG_06516 [Fusarium graminearum PH-1]		cl23766	fungal_TF_MHR superfamily
g10445	1.1906	NP_012910.1 Put3p [Saccharomyces cerevisiae S288C]	XP_955805.3 hypothetical protein NCU00054 [Neurospora crassa OR74A]	XP_046133635.1 uncharacterized protein B0J15DRAFT_391715 [Fusarium solani]	XP_031041264.1 uncharacterized protein FOYG_05923 [Fusarium oxysporum NRRL 32931]	XP_023425248.1 related to C6 transcription factor [Fusarium fujikuroi IMI 58289]	XP_018742183.1 hypothetical protein FVEG_00168 [Fusarium verticillioides 7600]	XP_011315760.1 hypothetical protein FGSG_00153 [Fusarium graminearum PH-1]		cl23766, cl00068	fungal_TF_MHR superfamily, GAL4 superfamily
g05747	1.16875	NP_012136.1 Asg1p [Saccharomyces cerevisiae S288C]	XP_963640.3 fungal specific transcription factor [Neurospora crassa OR74A]	XP_046127463.1 fungal-specific transcription factor domain-containing protein [Fusarium solani]	XP_031032436.1 uncharacterized protein FOYG_13326 [Fusarium oxysporum NRRL 32931]	XP_023423823.1 probable ZFR1 regulator of fumonisin biosynthesis [Fusarium fujikuroi IMI 58289]	XP_018756610.1 hypothetical protein FVEG_09648 [Fusarium verticillioides 7600]	XP_011317376.1 hypothetical protein FGSG_01564 [Fusarium graminearum PH-1]		cl23766, cl00068	fungal_TF_MHR superfamily, GAL4 superfamily
g13406	1.14288	NP_012886.3 Rgt1p [Saccharomyces cerevisiae S288C]	XP_961575.1 hypothetical protein NCU01209 [Neurospora crassa OR74A]	XP_046135180.1 uncharacterized protein B0J15DRAFT_390144 [Fusarium solani]	XP_031036647.1 uncharacterized protein FOYG_09126 [Fusarium oxysporum NRRL 32931]	---	---	---		cl00068	GAL4 superfamily
g06667	1.07381	NP_010007.1 chromatin-silencing transcriptional regulator TUP1 [Saccharomyces cerevisiae S288C]	XP_962921.1 transcriptional repressor rco-1 [Neurospora crassa OR74A]	XP_046127048.1 WD40-repeat-containing domain protein [Fusarium solani]	XP_031028240.1 Atypical/ALPHA protein kinase [Fusarium oxysporum NRRL 32931]	XP_023434699.1 trp-asp repea-containing protein [Fusarium fujikuroi IMI 58289]	XP_018761521.1 hypothetical protein FVEG_13345 [Fusarium verticillioides 7600]	XP_011328862.1 hypothetical protein FGSG_08955 [Fusarium graminearum PH-1]		cl07262	Tup_N superfamily
g00874	1.03041	---	XP_011393717.1 C6 zinc finger domain-containing protein [Neurospora crassa OR74A]	XP_046136923.1 fungal-specific transcription factor domain-containing protein [Fusarium solani]	XP_031047693.1 uncharacterized protein FOYG_03094 [Fusarium oxysporum NRRL 32931]	XP_023427964.1 related to regulatory protein for the arginine catabolic pathway [Fusarium fujikuroi IMI 58289]	XP_018754600.1 hypothetical protein FVEG_08193 [Fusarium verticillioides 7600]	XP_011321586.1 hypothetical protein FGSG_12319 [Fusarium graminearum PH-1]		cl23766	fungal_TF_MHR superfamily
g14144	1.00244	NP_014982.3 Tea1p [Saccharomyces cerevisiae S288C]	XP_959831.2 fungal specific transcription factor [Neurospora crassa OR74A]	XP_046129403.1 fungal-specific transcription factor domain-containing protein [Fusarium solani]	XP_031029004.1 uncharacterized protein FOYG_16174 [Fusarium oxysporum NRRL 32931]	XP_023424002.1 related to transcription factor nirA [Fusarium fujikuroi IMI 58289]	XP_018756329.1 hypothetical protein FVEG_16593 [Fusarium verticillioides 7600]	XP_011317175.1 hypothetical protein FGSG_01378 [Fusarium graminearum PH-1]		cl23766, cl00068	fungal_TF_MHR superfamily, GAL4 superfamily
g12199	-10.98	---	XP_959079.1 NmrA family transcriptional regulator [Neurospora crassa OR74A]	XP_046128257.1 uncharacterized protein B0J15DRAFT_64660 [Fusarium solani]	XP_031049075.1 uncharacterized protein FOYG_00047 [Fusarium oxysporum NRRL 32931]	XP_023435281.1 related to nitrogen metabolic regulation protein nmr [Fusarium fujikuroi IMI 58289]	XP_018761382.1 hypothetical protein FVEG_13232 [Fusarium verticillioides 7600]	XP_011322950.1 hypothetical protein FGSG_02856 [Fusarium graminearum PH-1]		cl21454	NADB_Rossmann superfamily
g08279	-8.63237	NP_015076.1 galactose-responsive transcription factor GAL4 [Saccharomyces cerevisiae S288C]	XP_956755.2 fungal specific transcription factor domain-containing protein [Neurospora crassa OR74A]	XP_046139795.1 uncharacterized protein B0J15DRAFT_557108 [Fusarium solani]	XP_031045578.1 uncharacterized protein FOYG_05287 [Fusarium oxysporum NRRL 32931]	XP_023426007.1 related to GAL4-like transcriptional activator [Fusarium fujikuroi IMI 58289]	XP_018751603.1 hypothetical protein FVEG_15822 [Fusarium verticillioides 7600]	XP_011323753.1 hypothetical protein FGSG_05242 [Fusarium graminearum PH-1]		cl23766, cl00068	fungal_TF_MHR superfamily, GAL4 superfamily
g12263	-7.8716	---	---	XP_046140817.1 fungal-specific transcription factor domain-containing protein [Fusarium solani]	XP_031038540.1 uncharacterized protein FOYG_10439 [Fusarium oxysporum NRRL 32931]	XP_023437277.1 uncharacterized protein FFUJ_11241 [Fusarium fujikuroi IMI 58289]	XP_018761408.1 hypothetical protein FVEG_17474 [Fusarium verticillioides 7600]	XP_011319662.1 hypothetical protein FGSG_10654 [Fusarium graminearum PH-1]		cl23766	fungal_TF_MHR superfamily
g07890	-7.81031	---	XP_961370.2 cutinase transcription factor 1 beta [Neurospora crassa OR74A]	XP_046139377.1 fungal-specific transcription factor domain-containing protein [Fusarium solani]	XP_031048173.1 cutinase transcription factor 1 beta [Fusarium oxysporum NRRL 32931]	XP_023427768.1 probable cutinase transcription factor 1 beta [Fusarium fujikuroi IMI 58289]	XP_018754226.1 cutinase transcription factor 1 beta [Fusarium verticillioides 7600]	XP_011326917.1 cutinase transcription factor 1 beta [Fusarium graminearum PH-1]		cl23766, cl00068	fungal_TF_MHR superfamily, GAL4 superfamily
g03575	-6.63906	NP_013661.1 transcription regulator GAL80 [Saccharomyces cerevisiae S288C]	XP_960345.1 hypothetical protein NCU07080 [Neurospora crassa OR74A]	XP_046126520.1 uncharacterized protein B0J15DRAFT_568598 [Fusarium solani]	XP_031048694.1 uncharacterized protein FOYG_03726 [Fusarium oxysporum NRRL 32931]	XP_023427491.1 related to transcription co-repressor GAL80 [Fusarium fujikuroi IMI 58289]	XP_018760722.1 hypothetical protein FVEG_12732 [Fusarium verticillioides 7600]	XP_011327336.1 hypothetical protein FGSG_07557 [Fusarium graminearum PH-1]		cl43234	MviM superfamily
g05332	-6.42323	---	---	XP_046130019.1 uncharacterized protein B0J15DRAFT_495290 [Fusarium solani]	XP_031038764.1 uncharacterized protein FOYG_07497 [Fusarium oxysporum NRRL 32931]	XP_023430074.1 bikaverin cluster-transcription factor enhancer [Fusarium fujikuroi IMI 58289]	XP_018747427.1 hypothetical protein FVEG_03383 [Fusarium verticillioides 7600]	---		cl21454	NADB_Rossmann superfamily
g06465	-5.90745	NP_012136.1 Asg1p [Saccharomyces cerevisiae S288C]	XP_961370.2 cutinase transcription factor 1 beta [Neurospora crassa OR74A]	XP_046123776.1 uncharacterized protein B0J15DRAFT_199661 [Fusarium solani]	XP_031036694.1 uncharacterized protein FOYG_09169 [Fusarium oxysporum NRRL 32931]	XP_023432697.1 related to cutinase transcription factor 1 beta [Fusarium fujikuroi IMI 58289]	XP_018744533.1 hypothetical protein FVEG_01591 [Fusarium verticillioides 7600]	XP_011320759.1 hypothetical protein FGSG_08064 [Fusarium graminearum PH-1]		cl23766, cl00068	fungal_TF_MHR superfamily, GAL4 superfamily
g13303	-5.10248	---	XP_961370.2 cutinase transcription factor 1 beta [Neurospora crassa OR74A]	XP_046135062.1 uncharacterized protein B0J15DRAFT_523102 [Fusarium solani]	XP_031048173.1 cutinase transcription factor 1 beta [Fusarium oxysporum NRRL 32931]	XP_023427768.1 probable cutinase transcription factor 1 beta [Fusarium fujikuroi IMI 58289]	XP_018754226.1 cutinase transcription factor 1 beta [Fusarium verticillioides 7600]	XP_011326917.1 cutinase transcription factor 1 beta [Fusarium graminearum PH-1]		cl23766, cl00068	fungal_TF_MHR superfamily, GAL4 superfamily
g15689	-4.58081	---	---	XP_046126504.1 transcriptional regulator PAI 2-type [Fusarium solani]	XP_031048757.1 transcriptional regulator [Fusarium oxysporum NRRL 32931]	XP_023435615.1 probable transcriptional regulator [Fusarium fujikuroi IMI 58289]	XP_018757622.1 transcriptional regulator [Fusarium verticillioides 7600]	XP_011321417.1 hypothetical protein FGSG_04209 [Fusarium graminearum PH-1]		cl00381	PNPOx/FlaRed_like superfamily
g02601	-4.5803	NP_012136.1 Asg1p [Saccharomyces cerevisiae S288C]	XP_961763.3 submerged protoperithecia-2 [Neurospora crassa OR74A]	XP_046134716.1 fungal-specific transcription factor domain-containing protein [Fusarium solani]	XP_031038745.1 uncharacterized protein FOYG_07481 [Fusarium oxysporum NRRL 32931]	XP_023430068.1 uncharacterized protein FFUJ_06739 [Fusarium fujikuroi IMI 58289]	XP_018747442.1 hypothetical protein FVEG_03393 [Fusarium verticillioides 7600]	XP_011315677.1 hypothetical protein FGSG_00081 [Fusarium graminearum PH-1]		cl23766, cl00068	fungal_TF_MHR superfamily, GAL4 superfamily
g15719	-4.08148	---	XP_961370.2 cutinase transcription factor 1 beta [Neurospora crassa OR74A]	XP_046132945.1 fungal-specific transcription factor domain-containing protein [Fusarium solani]	XP_031048173.1 cutinase transcription factor 1 beta [Fusarium oxysporum NRRL 32931]	XP_023427768.1 probable cutinase transcription factor 1 beta [Fusarium fujikuroi IMI 58289]	XP_018754226.1 cutinase transcription factor 1 beta [Fusarium verticillioides 7600]	XP_011326917.1 cutinase transcription factor 1 beta [Fusarium graminearum PH-1]		cl23766, cl00068	fungal_TF_MHR superfamily, GAL4 superfamily
g07857	-3.80859	---	XP_961370.2 cutinase transcription factor 1 beta [Neurospora crassa OR74A]	XP_046139377.1 fungal-specific transcription factor domain-containing protein [Fusarium solani]	XP_031048173.1 cutinase transcription factor 1 beta [Fusarium oxysporum NRRL 32931]	XP_023427768.1 probable cutinase transcription factor 1 beta [Fusarium fujikuroi IMI 58289]	XP_018754226.1 cutinase transcription factor 1 beta [Fusarium verticillioides 7600]	XP_011326917.1 cutinase transcription factor 1 beta [Fusarium graminearum PH-1]		cl23766	fungal_TF_MHR superfamily
g01765	-3.79582	---	XP_959079.1 NmrA family transcriptional regulator [Neurospora crassa OR74A]	XP_046130542.1 uncharacterized protein B0J15DRAFT_512727 [Fusarium solani]	XP_031033417.1 uncharacterized protein FOYG_11948 [Fusarium oxysporum NRRL 32931]	XP_023435288.1 related to nitrogen metabolic regulation protein nmr [Fusarium fujikuroi IMI 58289]	XP_018758443.1 hypothetical protein FVEG_11038 [Fusarium verticillioides 7600]	XP_011320844.1 hypothetical protein FGSG_07991 [Fusarium graminearum PH-1]		cl21454	NADB_Rossmann superfamily
g02060	-3.22489	NP_010007.1 chromatin-silencing transcriptional regulator TUP1 [Saccharomyces cerevisiae S288C]	XP_962921.1 transcriptional repressor rco-1 [Neurospora crassa OR74A]	XP_046130824.1 heterokaryon incompatibility protein-domain-containing protein [Fusarium solani]	XP_031040620.1 glucose repression regulatory protein TUP1 [Fusarium oxysporum NRRL 32931]	XP_023431397.1 probable transcriptional repressor rco-1 [Fusarium fujikuroi IMI 58289]	XP_018755936.1 glucose repression regulatory protein TUP1 [Fusarium verticillioides 7600]	XP_011321717.1 hypothetical protein FGSG_12346 [Fusarium graminearum PH-1]		cl06163	HET superfamily
g02546	-3.21416	NP_013114.1 Ppr1p [Saccharomyces cerevisiae S288C]	XP_963640.3 fungal specific transcription factor [Neurospora crassa OR74A]	XP_046130507.1 uncharacterized protein B0J15DRAFT_423716 [Fusarium solani]	XP_031032053.1 uncharacterized protein FOYG_12986 [Fusarium oxysporum NRRL 32931]	XP_023431296.1 uncharacterized protein FFUJ_14287 [Fusarium fujikuroi IMI 58289]	---	XP_011322157.1 hypothetical protein FGSG_03551 [Fusarium graminearum PH-1]		cl23766	fungal_TF_MHR superfamily
g09225	-3.204	NP_012048.3 Stb5p [Saccharomyces cerevisiae S288C]	XP_011393289.1 fungal specific transcription factor domain-containing protein [Neurospora crassa OR74A]	XP_046129368.1 fungal-specific transcription factor domain-containing protein [Fusarium solani]	XP_031050867.1 uncharacterized protein FOYG_01392 [Fusarium oxysporum NRRL 32931]	XP_023429340.1 uncharacterized protein FFUJ_13457 [Fusarium fujikuroi IMI 58289]	XP_018749585.1 hypothetical protein FVEG_15565 [Fusarium verticillioides 7600]	XP_011323723.1 hypothetical protein FGSG_12703 [Fusarium graminearum PH-1]		cl23766	fungal_TF_MHR superfamily
g06189	-3.1278	---	XP_958309.2 hypothetical protein NCU09910 [Neurospora crassa OR74A]	XP_046128006.1 uncharacterized protein B0J15DRAFT_500122 [Fusarium solani]	XP_031034892.1 uncharacterized protein FOYG_10638 [Fusarium oxysporum NRRL 32931]	XP_023438032.1 related to transcriptional activator Mut3p [Fusarium fujikuroi IMI 58289]	XP_018759448.1 hypothetical protein FVEG_17082 [Fusarium verticillioides 7600]	XP_011319577.1 hypothetical protein FGSG_10578 [Fusarium graminearum PH-1]		cl23766	fungal_TF_MHR superfamily
g15800	-2.87285	NP_012861.1 stress-responsive transcriptional activator MSN4 [Saccharomyces cerevisiae S288C]	XP_955791.1 hypothetical protein NCU03552 [Neurospora crassa OR74A]	XP_046129632.1 uncharacterized protein B0J15DRAFT_399666 [Fusarium solani]	XP_031029348.1 uncharacterized protein FOYG_16413 [Fusarium oxysporum NRRL 32931]	XP_023426853.1 related to zinc finger protein odd-paired-like (opl) [Fusarium fujikuroi IMI 58289]	XP_018756637.1 hypothetical protein FVEG_09661 [Fusarium verticillioides 7600]	XP_011317392.1 hypothetical protein FGSG_01576 [Fusarium graminearum PH-1]		cl23491	zf-C2H2 superfamily
g03677	-2.68833	---	---	XP_046129836.1 fungal-specific transcription factor domain-containing protein [Fusarium solani]	XP_031030676.1 uncharacterized protein FOYG_15974 [Fusarium oxysporum NRRL 32931]	XP_023438119.1 uncharacterized protein FFUJ_11965 [Fusarium fujikuroi IMI 58289]	XP_018757857.1 hypothetical protein FVEG_10573 [Fusarium verticillioides 7600]	---		cl23766	fungal_TF_MHR superfamily
g02411	-2.61779	---	XP_961370.2 cutinase transcription factor 1 beta [Neurospora crassa OR74A]	XP_046125201.1 fungal-specific transcription factor domain-containing protein [Fusarium solani]	XP_031046395.1 uncharacterized protein FOYG_02314 [Fusarium oxysporum NRRL 32931]	XP_023428632.1 related to cutinase transcription factor 1 beta [Fusarium fujikuroi IMI 58289]	XP_018750905.1 hypothetical protein FVEG_15709 [Fusarium verticillioides 7600]	XP_011321800.1 hypothetical protein FGSG_03873 [Fusarium graminearum PH-1]		cl23766	fungal_TF_MHR superfamily
g06313	-2.47882	---	XP_964143.3 C2H2 type zinc finger domain-containing protein [Neurospora crassa OR74A]	XP_046130896.1 uncharacterized protein B0J15DRAFT_595223 [Fusarium solani]	XP_031031474.1 uncharacterized protein FOYG_14643 [Fusarium oxysporum NRRL 32931]	XP_023434688.1 related to C2H2 transcription factor [Fusarium fujikuroi IMI 58289]	XP_018762348.1 hypothetical protein FVEG_13928 [Fusarium verticillioides 7600]	XP_011325846.1 hypothetical protein FGSG_11388 [Fusarium graminearum PH-1]		cl23766, cl00068	fungal_TF_MHR superfamily, GAL4 superfamily
g08059	-2.41797	---	XP_955949.1 zinc finger transcription factor 1 [Neurospora crassa OR74A]	XP_046139560.1 uncharacterized protein B0J15DRAFT_506954 [Fusarium solani]	XP_031030845.1 uncharacterized protein FOYG_16133 [Fusarium oxysporum NRRL 32931]	XP_023427422.1 uncharacterized protein FFUJ_02276 [Fusarium fujikuroi IMI 58289]	XP_018760643.1 hypothetical protein FVEG_17323 [Fusarium verticillioides 7600]	XP_011328718.1 hypothetical protein FGSG_09075 [Fusarium graminearum PH-1]		cl23766	fungal_TF_MHR superfamily
g12121	-2.36573	NP_015243.1 DNA-binding ATPase [Saccharomyces cerevisiae S288C]	XP_001727986.2 hypothetical protein NCU10809 [Neurospora crassa OR74A]	XP_046123996.1 SNF2 family N-terminal domain-containing protein [Fusarium solani]	XP_031039040.1 uncharacterized protein FOYG_07737 [Fusarium oxysporum NRRL 32931]	XP_023430109.1 related to helicase-like transcription factor protein [Fusarium fujikuroi IMI 58289]	XP_018758450.1 hypothetical protein FVEG_16956 [Fusarium verticillioides 7600]	XP_011320585.1 hypothetical protein FGSG_08223 [Fusarium graminearum PH-1]		cl28899	DEAD-like_helicase_N superfamily
g03635	-2.27587	---	XP_011393157.1 bZIP-type transcription factor [Neurospora crassa OR74A]	XP_046126357.1 uncharacterized protein B0J15DRAFT_515935 [Fusarium solani]	XP_031050125.1 uncharacterized protein FOYG_00876 [Fusarium oxysporum NRRL 32931]	XP_023429799.1 uncharacterized protein FFUJ_14713 [Fusarium fujikuroi IMI 58289]	XP_018759688.1 hypothetical protein FVEG_11916 [Fusarium verticillioides 7600]	XP_011318245.1 hypothetical protein FGSG_02336 [Fusarium graminearum PH-1]		cl21462	bZIP superfamily
g11328	-2.24536	---	XP_958079.1 fungal specific transcription factor [Neurospora crassa OR74A]	XP_046131818.1 uncharacterized protein B0J15DRAFT_446204 [Fusarium solani]	XP_031036435.1 uncharacterized protein FOYG_11709 [Fusarium oxysporum NRRL 32931]	XP_023432990.1 related to transcription activator [Fusarium fujikuroi IMI 58289]	XP_018752146.1 hypothetical protein FVEG_06586 [Fusarium verticillioides 7600]	XP_011328713.1 hypothetical protein FGSG_09080 [Fusarium graminearum PH-1]		cl23766	fungal_TF_MHR superfamily
g02781	-2.21814	NP_011502.1 drug-responsive transcription factor PDR1 [Saccharomyces cerevisiae S288C]	XP_960701.3 transcriptional activator protein acu-15 [Neurospora crassa OR74A]	XP_046133505.1 uncharacterized protein B0J15DRAFT_444249 [Fusarium solani]	XP_031030685.1 uncharacterized protein FOYG_15982 [Fusarium oxysporum NRRL 32931]	XP_023438122.1 uncharacterized protein FFUJ_11973 [Fusarium fujikuroi IMI 58289]	XP_018757868.1 hypothetical protein FVEG_10581, partial [Fusarium verticillioides 7600]	XP_011328397.1 hypothetical protein FGSG_09349 [Fusarium graminearum PH-1]		cl23766, cl00068	fungal_TF_MHR superfamily, GAL4 superfamily
g10578	-2.20097	---	XP_958528.2 hypothetical protein NCU09829 [Neurospora crassa OR74A]	XP_046126073.1 fungal-specific transcription factor domain-containing protein [Fusarium solani]	XP_031051621.1 uncharacterized protein FOYG_01930 [Fusarium oxysporum NRRL 32931]	XP_023428887.1 uncharacterized protein FFUJ_12972 [Fusarium fujikuroi IMI 58289]	XP_018748863.1 hypothetical protein FVEG_04424 [Fusarium verticillioides 7600]	XP_011324422.1 hypothetical protein FGSG_05827 [Fusarium graminearum PH-1]		cl23766	fungal_TF_MHR superfamily
g10806	-2.19818	NP_015522.1 putative maltose-responsive transcription factor [Saccharomyces cerevisiae S288C]	XP_011393289.1 fungal specific transcription factor domain-containing protein [Neurospora crassa OR74A]	XP_046130458.1 uncharacterized protein B0J15DRAFT_513657 [Fusarium solani]	XP_031032886.1 uncharacterized protein FOYG_13754 [Fusarium oxysporum NRRL 32931]	XP_023436513.1 uncharacterized protein FFUJ_10487 [Fusarium fujikuroi IMI 58289]	XP_018762202.1 hypothetical protein FVEG_14103 [Fusarium verticillioides 7600]	XP_011323723.1 hypothetical protein FGSG_12703 [Fusarium graminearum PH-1]		cl00068	GAL4 superfamily
g11828	-2.14195	NP_013199.1 Cha4p [Saccharomyces cerevisiae S288C]	XP_011394046.1 hypothetical protein NCU16667 [Neurospora crassa OR74A]	XP_046131259.1 uncharacterized protein B0J15DRAFT_395472 [Fusarium solani]	XP_031035687.1 uncharacterized protein FOYG_11166 [Fusarium oxysporum NRRL 32931]	XP_023433414.1 related to Zn(II)2Cys6 transcriptional activator [Fusarium fujikuroi IMI 58289]	XP_018752847.1 hypothetical protein FVEG_16005 [Fusarium verticillioides 7600]	XP_011324013.1 hypothetical protein FGSG_12742 [Fusarium graminearum PH-1]		cl23766, cl00068	fungal_TF_MHR superfamily, GAL4 superfamily
g06078	-1.99451	NP_012048.3 Stb5p [Saccharomyces cerevisiae S288C]	XP_011393289.1 fungal specific transcription factor domain-containing protein [Neurospora crassa OR74A]	XP_046127894.1 uncharacterized protein B0J15DRAFT_563958 [Fusarium solani]	XP_031050869.1 uncharacterized protein FOYG_01392 [Fusarium oxysporum NRRL 32931]	XP_023434009.1 uncharacterized protein FFUJ_14076 [Fusarium fujikuroi IMI 58289]	XP_018749585.1 hypothetical protein FVEG_15565 [Fusarium verticillioides 7600]	XP_011325123.1 hypothetical protein FGSG_11216 [Fusarium graminearum PH-1]		cl23766	fungal_TF_MHR superfamily
g07067	-1.98048	NP_014007.1 DNA-binding transcription factor CAT8 [Saccharomyces cerevisiae S288C]	XP_964300.1 hypothetical protein NCU02142 [Neurospora crassa OR74A]	XP_046136055.1 uncharacterized protein B0J15DRAFT_509626 [Fusarium solani]	XP_031037636.1 uncharacterized protein FOYG_09794 [Fusarium oxysporum NRRL 32931]	XP_023432148.1 related to zinc cluster transcription factor [Fusarium fujikuroi IMI 58289]	XP_018745487.1 hypothetical protein FVEG_02173 [Fusarium verticillioides 7600]	XP_011320258.1 hypothetical protein FGSG_08502 [Fusarium graminearum PH-1]		cl22421	ZIP_Gal4p-like superfamily, GAL4 superfamily
g12855	-1.93617	NP_012136.1 Asg1p [Saccharomyces cerevisiae S288C]	XP_961763.3 submerged protoperithecia-2 [Neurospora crassa OR74A]	XP_046134568.1 uncharacterized protein B0J15DRAFT_509948 [Fusarium solani]	XP_031038745.1 uncharacterized protein FOYG_07481 [Fusarium oxysporum NRRL 32931]	XP_023430068.1 uncharacterized protein FFUJ_06739 [Fusarium fujikuroi IMI 58289]	XP_018747442.1 hypothetical protein FVEG_03393 [Fusarium verticillioides 7600]	XP_011315677.1 hypothetical protein FGSG_00081 [Fusarium graminearum PH-1]		cl23766, cl00068	fungal_TF_MHR superfamily, GAL4 superfamily
g14818	-1.92815	---	XP_958867.2 hypothetical protein NCU07374 [Neurospora crassa OR74A]	XP_046138599.1 uncharacterized protein B0J15DRAFT_459053 [Fusarium solani]	XP_031042426.1 uncharacterized protein FOYG_06682 [Fusarium oxysporum NRRL 32931]	XP_023424604.1 related to acetate regulatory DNA binding protein FacB [Fusarium fujikuroi IMI 58289]	XP_018743294.1 hypothetical protein FVEG_14747 [Fusarium verticillioides 7600]	XP_011316066.1 hypothetical protein FGSG_00404 [Fusarium graminearum PH-1]		cl23766, cl00068	fungal_TF_MHR superfamily
g12990	-1.85425	---	XP_961794.1 homeobox and C2H2 transcription factor [Neurospora crassa OR74A]	XP_046134742.1 uncharacterized protein B0J15DRAFT_441326 [Fusarium solani]	XP_031030703.1 uncharacterized protein FOYG_15998 [Fusarium oxysporum NRRL 32931]	XP_023437989.1 uncharacterized protein FFUJ_11995 [Fusarium fujikuroi IMI 58289]	XP_018757841.1 hypothetical protein FVEG_10561 [Fusarium verticillioides 7600]	XP_011328145.1 hypothetical protein FGSG_09566 [Fusarium graminearum PH-1]
g08367	-1.79449	NP_012329.1 uncharacterized protein YJL206C [Saccharomyces cerevisiae S288C]	XP_965578.1 ADA-3 [Neurospora crassa OR74A]	XP_046139920.1 fungal-specific transcription factor domain-containing protein [Fusarium solani]	XP_031038975.1 uncharacterized protein FOYG_07683 [Fusarium oxysporum NRRL 32931]	XP_023430260.1 uncharacterized protein FFUJ_06949 [Fusarium fujikuroi IMI 58289]	XP_018747227.1 hypothetical protein FVEG_03225 [Fusarium verticillioides 7600]	XP_011319497.1 hypothetical protein FGSG_10505 [Fusarium graminearum PH-1]		cl23766, cl00068	fungal_TF_MHR superfamily, GAL4 superfamily
g02642	-1.75326	NP_012048.3 Stb5p [Saccharomyces cerevisiae S288C]	XP_962311.3 purine utilization positive regulator [Neurospora crassa OR74A]	XP_046128145.1 fungal-specific transcription factor domain-containing protein [Fusarium solani]	XP_031031981.1 uncharacterized protein FOYG_15136 [Fusarium oxysporum NRRL 32931]	XP_023434018.1 uncharacterized protein FFUJ_14067 [Fusarium fujikuroi IMI 58289]	XP_018761193.1 hypothetical protein FVEG_17443 [Fusarium verticillioides 7600]	XP_011323618.1 positive regulator of purine utilization [Fusarium graminearum PH-1]		cl23766, cl00068	fungal_TF_MHR superfamily
g06100	-1.71098	NP_015076.1 galactose-responsive transcription factor GAL4 [Saccharomyces cerevisiae S288C]	XP_011393289.1 fungal specific transcription factor domain-containing protein [Neurospora crassa OR74A]	XP_046127895.1 uncharacterized protein B0J15DRAFT_499935 [Fusarium solani]	XP_031050865.1 uncharacterized protein FOYG_01392 [Fusarium oxysporum NRRL 32931]	XP_023429340.1 uncharacterized protein FFUJ_13457 [Fusarium fujikuroi IMI 58289]	XP_018749582.1 hypothetical protein FVEG_15565 [Fusarium verticillioides 7600]	XP_011323723.1 hypothetical protein FGSG_12703 [Fusarium graminearum PH-1]		cl00068	GAL4 superfamily
g06457	-1.61129	NP_014007.1 DNA-binding transcription factor CAT8 [Saccharomyces cerevisiae S288C]	XP_960701.3 transcriptional activator protein acu-15 [Neurospora crassa OR74A]	XP_046123790.1 fungal-specific transcription factor domain-containing protein [Fusarium solani]	XP_031028685.1 uncharacterized protein FOYG_17057 [Fusarium oxysporum NRRL 32931]	XP_023438025.1 related to transcription activator protein acu-15 [Fusarium fujikuroi IMI 58289]	XP_018757789.1 hypothetical protein FVEG_10524 [Fusarium verticillioides 7600]	XP_011322629.1 hypothetical protein FGSG_03138 [Fusarium graminearum PH-1]		cl23766, cl00068	fungal_TF_MHR superfamily, GAL4 superfamily
g12293	-1.60478	---	XP_959079.1 NmrA family transcriptional regulator [Neurospora crassa OR74A]	XP_046128181.1 uncharacterized protein B0J15DRAFT_63918 [Fusarium solani]	XP_031033417.1 uncharacterized protein FOYG_11948 [Fusarium oxysporum NRRL 32931]	XP_023435288.1 related to nitrogen metabolic regulation protein nmr [Fusarium fujikuroi IMI 58289]	XP_018758443.1 hypothetical protein FVEG_11038 [Fusarium verticillioides 7600]	XP_011320939.1 hypothetical protein FGSG_12211 [Fusarium graminearum PH-1]		cl21454	NADB_Rossmann superfamily
g11011	-1.55384	---	XP_964351.2 C6 zinc finger domain-containing protein [Neurospora crassa OR74A]	XP_046130211.1 uncharacterized protein B0J15DRAFT_513446 [Fusarium solani]	XP_031032383.1 uncharacterized protein FOYG_13280 [Fusarium oxysporum NRRL 32931]	XP_023436892.1 related to C6 transcription factor [Fusarium fujikuroi IMI 58289]	XP_018755102.1 hypothetical protein FVEG_16356 [Fusarium verticillioides 7600]	XP_011322477.1 hypothetical protein FGSG_03271 [Fusarium graminearum PH-1]		cl23766	fungal_TF_MHR superfamily
g13365	-1.48686	NP_012329.1 uncharacterized protein YJL206C [Saccharomyces cerevisiae S288C]	XP_960701.3 transcriptional activator protein acu-15 [Neurospora crassa OR74A]	XP_046123251.1 fungal-specific transcription factor domain-containing protein [Fusarium solani]	XP_031038748.1 uncharacterized protein FOYG_07481 [Fusarium oxysporum NRRL 32931]	XP_023430068.1 uncharacterized protein FFUJ_06739 [Fusarium fujikuroi IMI 58289]	XP_018747441.1 hypothetical protein FVEG_03393 [Fusarium verticillioides 7600]	XP_011322629.1 hypothetical protein FGSG_03138 [Fusarium graminearum PH-1]		cl23766	fungal_TF_MHR superfamily
g14247	-1.46432	---	XP_011393157.1 bZIP-type transcription factor [Neurospora crassa OR74A]	XP_046139218.1 uncharacterized protein B0J15DRAFT_135554 [Fusarium solani]	XP_031043638.1 uncharacterized protein FOYG_07322 [Fusarium oxysporum NRRL 32931]	XP_023425446.1 related to AP-1-like transcription factor [Fusarium fujikuroi IMI 58289]	XP_018744315.1 hypothetical protein FVEG_01443 [Fusarium verticillioides 7600]	XP_011317099.1 hypothetical protein FGSG_01313 [Fusarium graminearum PH-1]		cl21462	bZIP superfamily
g03270	-1.35134	NP_013199.1 Cha4p [Saccharomyces cerevisiae S288C]	XP_961370.2 cutinase transcription factor 1 beta [Neurospora crassa OR74A]	XP_046132945.1 fungal-specific transcription factor domain-containing protein [Fusarium solani]	XP_031048173.1 cutinase transcription factor 1 beta [Fusarium oxysporum NRRL 32931]	XP_023427768.1 probable cutinase transcription factor 1 beta [Fusarium fujikuroi IMI 58289]	XP_018754226.1 cutinase transcription factor 1 beta [Fusarium verticillioides 7600]	XP_011326917.1 cutinase transcription factor 1 beta [Fusarium graminearum PH-1]		cl23766, cl00068	fungal_TF_MHR superfamily, GAL4 superfamily
g01172	-1.30617	NP_010317.3 Lys14p [Saccharomyces cerevisiae S288C]	XP_959706.3 hypothetical protein NCU02386 [Neurospora crassa OR74A]	XP_046136585.1 uncharacterized protein B0J15DRAFT_387312 [Fusarium solani]	XP_031050571.1 uncharacterized protein FOYG_01210 [Fusarium oxysporum NRRL 32931]	XP_023429492.1 related to negative acting factor [Fusarium fujikuroi IMI 58289]	XP_018749885.1 hypothetical protein FVEG_15590 [Fusarium verticillioides 7600]	XP_011325044.1 hypothetical protein FGSG_06382 [Fusarium graminearum PH-1]		cl23766, cl00068	fungal_TF_MHR superfamily, GAL4 superfamily
g05082	-1.25579	NP_014982.3 Tea1p [Saccharomyces cerevisiae S288C]	XP_962507.3 nitrogen assimilation transcription factor nit-4 [Neurospora crassa OR74A]	XP_046125292.1 fungal-specific transcription factor domain-containing protein [Fusarium solani]	XP_031034517.1 uncharacterized protein FOYG_12740 [Fusarium oxysporum NRRL 32931]	XP_023435876.1 related to pathway-specific regulatory protein nit-4 [Fusarium fujikuroi IMI 58289]	XP_018757214.1 hypothetical protein FVEG_10134 [Fusarium verticillioides 7600]	XP_011321738.1 hypothetical protein FGSG_03929 [Fusarium graminearum PH-1]		cl23766	fungal_TF_MHR superfamily
g14780	-1.24963	NP_013344.1 putative signal sequence-binding GTPase GPN3 [Saccharomyces cerevisiae S288C]	XP_965431.2 ATP binding protein [Neurospora crassa OR74A]	XP_046138618.1 GPN-loop GTPase [Fusarium solani]	XP_031042455.1 GPN-loop GTPase 3 like [Fusarium oxysporum NRRL 32931]	XP_023424588.1 related to Gop-2 protein [Fusarium fujikuroi IMI 58289]	XP_018743327.1 GPN-loop GTPase 3 like [Fusarium verticillioides 7600]	XP_011316086.1 transcription factor FET5 [Fusarium graminearum PH-1]		cl38936	P-loop_NTPase superfamily
g07321	-1.22447	NP_013114.1 Ppr1p [Saccharomyces cerevisiae S288C]	XP_011393289.1 fungal specific transcription factor domain-containing protein [Neurospora crassa OR74A]	XP_046136335.1 fungal-specific transcription factor domain-containing protein [Fusarium solani]	XP_031038774.1 uncharacterized protein FOYG_07507 [Fusarium oxysporum NRRL 32931]	XP_023429989.1 uncharacterized protein FFUJ_14823 [Fusarium fujikuroi IMI 58289]	XP_018759559.1 hypothetical protein FVEG_17102 [Fusarium verticillioides 7600]	XP_011323723.1 hypothetical protein FGSG_12703 [Fusarium graminearum PH-1]		cl23766, cl00068	fungal_TF_MHR superfamily, GAL4 superfamily
g07381	-1.20973	NP_010007.1 chromatin-silencing transcriptional regulator TUP1 [Saccharomyces cerevisiae S288C]	XP_964510.1 WD repeat containing protein 23 [Neurospora crassa OR74A]	XP_046136408.1 WD40-repeat-containing domain protein [Fusarium solani]	XP_031038130.1 uncharacterized protein FOYG_10135 [Fusarium oxysporum NRRL 32931]	XP_023431868.1 related to WD repeat protein [Fusarium fujikuroi IMI 58289]	XP_018745943.1 hypothetical protein FVEG_02469 [Fusarium verticillioides 7600]	XP_011319836.1 hypothetical protein FGSG_08872 [Fusarium graminearum PH-1]		cl29593	WD40 superfamily
g15857	-1.19079	NP_012861.1 stress-responsive transcriptional activator MSN4 [Saccharomyces cerevisiae S288C]	XP_955791.1 hypothetical protein NCU03552 [Neurospora crassa OR74A]	XP_046129632.1 uncharacterized protein B0J15DRAFT_399666 [Fusarium solani]	XP_031029348.1 uncharacterized protein FOYG_16413 [Fusarium oxysporum NRRL 32931]	XP_023426853.1 related to zinc finger protein odd-paired-like (opl) [Fusarium fujikuroi IMI 58289]	XP_018756637.1 hypothetical protein FVEG_09661 [Fusarium verticillioides 7600]	XP_011317392.1 hypothetical protein FGSG_01576 [Fusarium graminearum PH-1]		cl23491	zf-C2H2 superfamily
g10542	-1.16136	NP_116603.1 DNA-binding domain containing protein [Saccharomyces cerevisiae S288C]	XP_961778.1 RING-4 [Neurospora crassa OR74A]	XP_046126018.1 uncharacterized protein B0J15DRAFT_140544 [Fusarium solani]	XP_031038904.1 uncharacterized protein FOYG_07624 [Fusarium oxysporum NRRL 32931]	XP_023430202.1 related to transcription activator amyR [Fusarium fujikuroi IMI 58289]	XP_018747298.1 hypothetical protein FVEG_15230 [Fusarium verticillioides 7600]	XP_011319668.1 hypothetical protein FGSG_10660 [Fusarium graminearum PH-1]		cl23766	fungal_TF_MHR superfamily
g07511	-1.14988	---	XP_011393289.1 fungal specific transcription factor domain-containing protein [Neurospora crassa OR74A]	XP_046125771.1 uncharacterized protein B0J15DRAFT_471267 [Fusarium solani]	XP_031038358.1 uncharacterized protein FOYG_10282 [Fusarium oxysporum NRRL 32931]	XP_023431764.1 uncharacterized protein FFUJ_05590 [Fusarium fujikuroi IMI 58289]	XP_018761223.1 hypothetical protein FVEG_17445 [Fusarium verticillioides 7600]	XP_011323026.1 hypothetical protein FGSG_02787 [Fusarium graminearum PH-1]		cl23766	fungal_TF_MHR superfamily
g13960	-1.08379	NP_012136.1 Asg1p [Saccharomyces cerevisiae S288C]	XP_963640.3 fungal specific transcription factor [Neurospora crassa OR74A]	XP_046129616.1 fungal-specific transcription factor domain-containing protein [Fusarium solani]	XP_031029326.1 uncharacterized protein FOYG_16397 [Fusarium oxysporum NRRL 32931]	XP_023423823.1 probable ZFR1 regulator of fumonisin biosynthesis [Fusarium fujikuroi IMI 58289]	XP_018756610.1 hypothetical protein FVEG_09648 [Fusarium verticillioides 7600]	XP_011317376.1 hypothetical protein FGSG_01564 [Fusarium graminearum PH-1]		cl23766, cl00068	fungal_TF_MHR superfamily, GAL4 superfamily
g14238	-1.08328	NP_012136.1 Asg1p [Saccharomyces cerevisiae S288C]	XP_964064.3 C6 transcription factor [Neurospora crassa OR74A]	XP_046139224.1 fungal-specific transcription factor domain-containing protein [Fusarium solani]	XP_031043648.1 uncharacterized protein FOYG_07327 [Fusarium oxysporum NRRL 32931]	XP_023424063.1 related to transcription activator protein acu-15 [Fusarium fujikuroi IMI 58289]	XP_018744322.1 hypothetical protein FVEG_14842 [Fusarium verticillioides 7600]	XP_011317104.1 hypothetical protein FGSG_01318 [Fusarium graminearum PH-1]		cl23766	fungal_TF_MHR superfamily
g06718	-1.06517	NP_012048.3 Stb5p [Saccharomyces cerevisiae S288C]	XP_011393289.1 fungal specific transcription factor domain-containing protein [Neurospora crassa OR74A]	XP_046135690.1 uncharacterized protein B0J15DRAFT_389692 [Fusarium solani]	XP_031038774.1 uncharacterized protein FOYG_07507 [Fusarium oxysporum NRRL 32931]	XP_023438058.1 uncharacterized protein FFUJ_12071 [Fusarium fujikuroi IMI 58289]	XP_018749582.1 hypothetical protein FVEG_15565 [Fusarium verticillioides 7600]	XP_011325123.1 hypothetical protein FGSG_11216 [Fusarium graminearum PH-1]		cl23766, cl00068	fungal_TF_MHR superfamily, GAL4 superfamily
g02107	-1.06179	NP_012048.3 Stb5p [Saccharomyces cerevisiae S288C]	XP_011393289.1 fungal specific transcription factor domain-containing protein [Neurospora crassa OR74A]	XP_046130926.1 uncharacterized protein B0J15DRAFT_494920 [Fusarium solani]	XP_031038358.1 uncharacterized protein FOYG_10282 [Fusarium oxysporum NRRL 32931]	XP_023431764.1 uncharacterized protein FFUJ_05590 [Fusarium fujikuroi IMI 58289]	XP_018761223.1 hypothetical protein FVEG_17445 [Fusarium verticillioides 7600]	XP_011323026.1 hypothetical protein FGSG_02787 [Fusarium graminearum PH-1]		cl23766	fungal_TF_MHR superfamily
